# Supplementary material for: Theoretical investigation of the effect of hydrogen bonding on the stereoselectivity of the Diels–Alder reaction
Source: Royal Society of Chemistry journal article supplement (doi:10.1039/d1nj01373d), 2021-01-01
Supplement: d1nj01373d1.pdf [file d1nj01373d1.pdf]

## Theoretical Investigation of the Effect of Hydrogen Bonding on the Stereoselectivity of the Diels-Alder Reaction

*Davood Taherinia\*<sup>†</sup>, M. Mohsen Mahmoodi<sup>†</sup>, Alireza Fattahi<sup>†</sup>*

<sup>†</sup> Department of Chemistry, Sharif University of Technology, Tehran 11155-9516, Iran

### Optimized Structures of the MCs

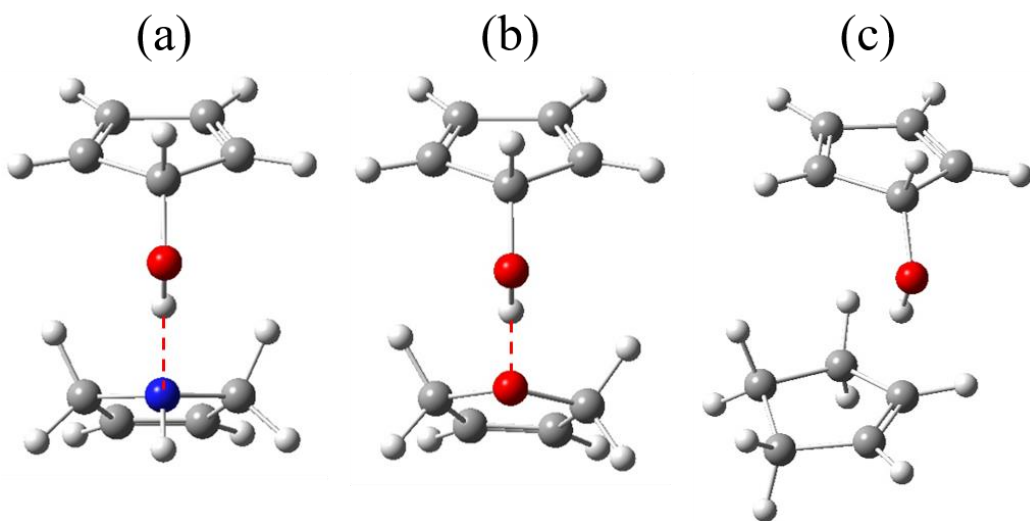

Figure S1. The optimized structures of the MCs for: (a) entry 1-1; (b) entry 1-2; and (c) entry 1-3. The red dashed lines indicate the HB interaction.

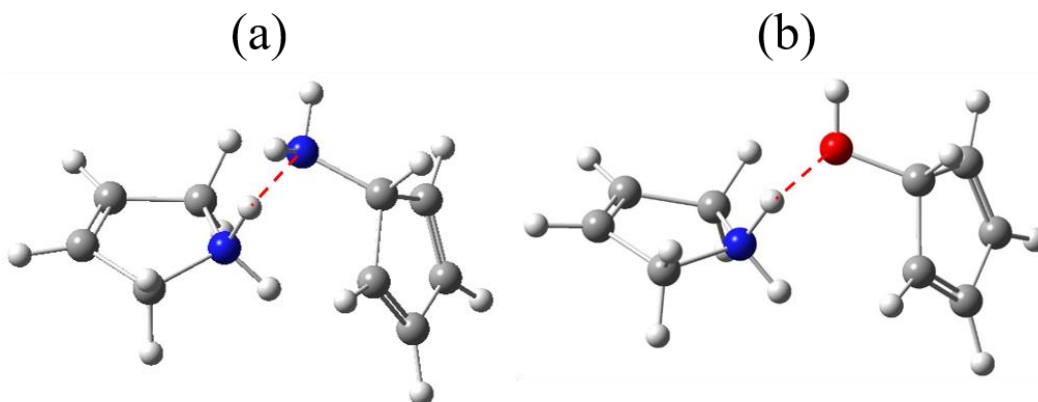

Figure S2. The optimized structures of the MCs for: (a) entry 2-1; and (b) entry 2-2. The red dashed lines indicate the HB interaction.

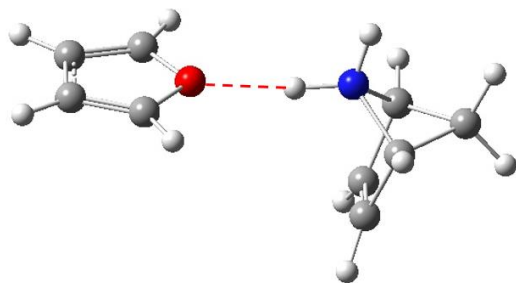

Figure S3. The optimized structure of the MC associated with the reactants of Scheme 3. The red dashed line indicates the HB interaction.

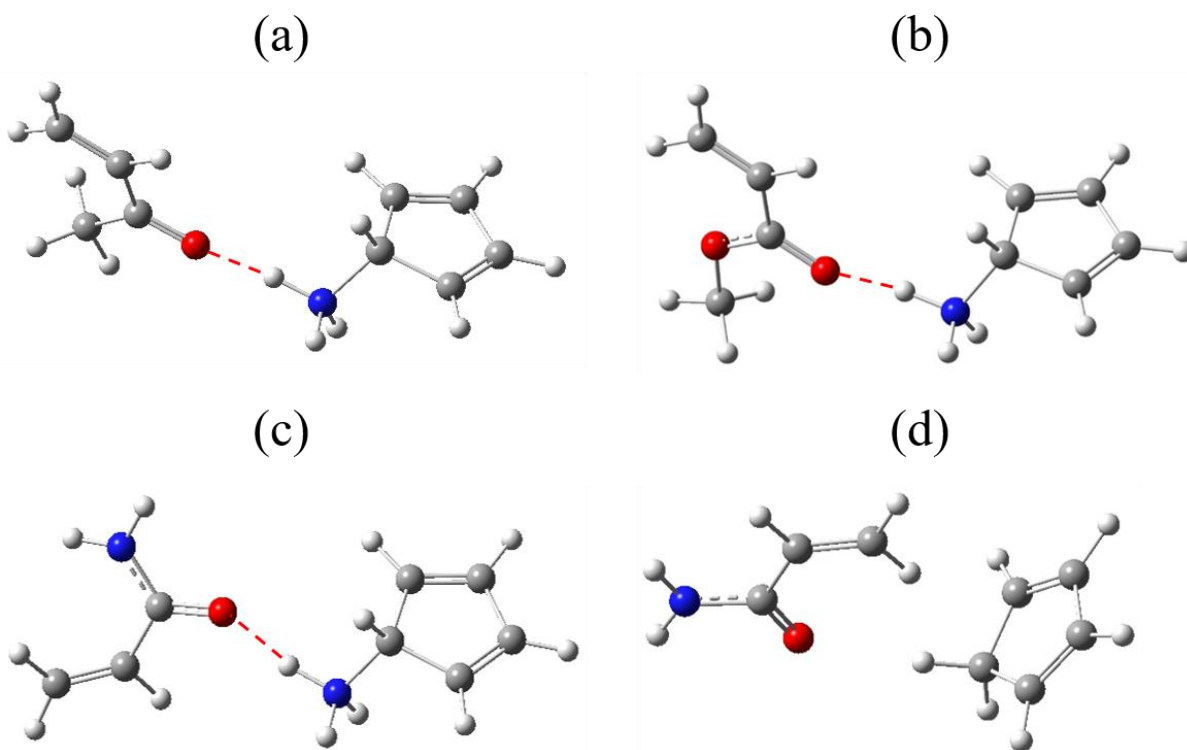

Figure S4. The optimized structures of the MCs for: (a) entry 3-1; (b) entry 3-2; (c) entry 3-3; and (d) entry 3-4. The red dashed lines indicate the HB interaction.

## Results of the QTAIM Analysis

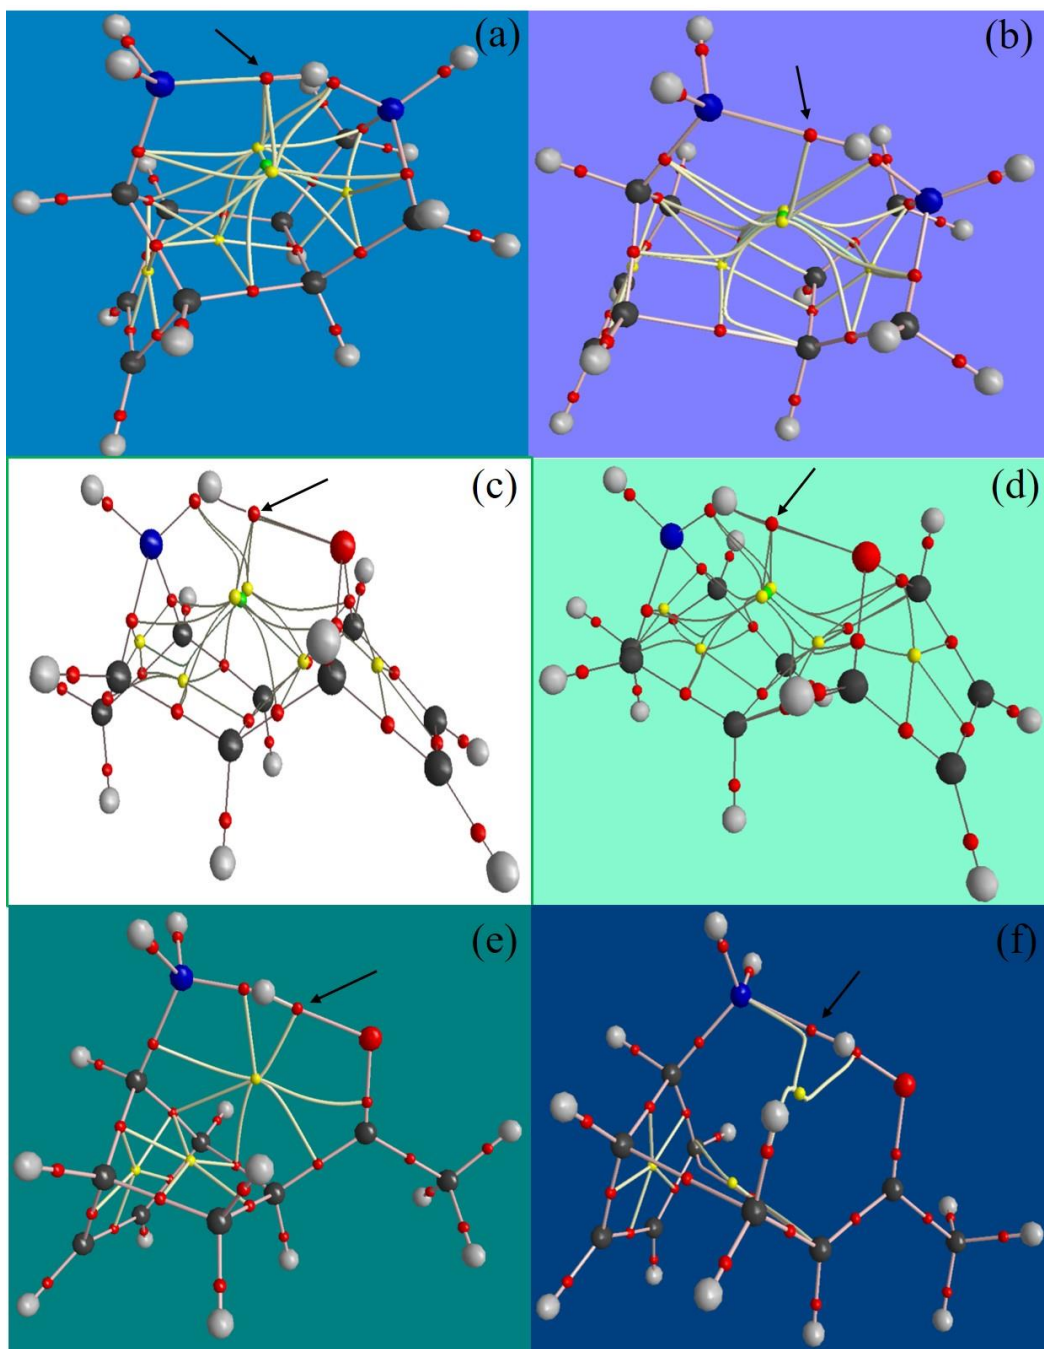

Figure S5. The results of the QTAIM analysis for: (a) exo cycloadduct corresponding to entry 2-1; (b) exo TS corresponding to entry 2-1; (c) exo1 cycloadduct corresponding to Scheme 3; (d) exo1 TS corresponding to Scheme 3; (e) exo cycloadduct corresponding to entry 3-1; and (f) exo TS corresponding to entry 3-1. Black arrows indicate the critical point corresponding to the HB interaction.

## Cartesian Coordinates and Imaginary Frequencies of TS Structures

Name: 1-1 endo

Imaginary Frequency: 478.15 cm<sup>-1</sup>

Coordinates:

|   | X           | Y           | Z           |
|---|-------------|-------------|-------------|
| C | 1.10196600  | 0.46035100  | 1.16107200  |
| C | 1.10198700  | 0.46039600  | -1.16104400 |
| C | 1.90992400  | -0.09112400 | 0.00001100  |
| H | 2.85752900  | 0.46812400  | 0.00003300  |
| C | -0.56768600 | -0.97099400 | 0.69704200  |
| C | -0.56768900 | -0.97094100 | -0.69710500 |
| H | 1.34780400  | 0.24717500  | 2.19448500  |
| H | 1.34787000  | 0.24727200  | -2.19445700 |
| C | 0.56316300  | 1.66402800  | 0.70384300  |
| H | 0.12940700  | 2.43550300  | 1.32765100  |
| C | 0.56316900  | 1.66406200  | -0.70376700 |
| H | 0.12941600  | 2.43556300  | -1.32754500 |
| O | 2.31151200  | -1.44219000 | -0.00001300 |
| H | 1.53107100  | -2.00339200 | -0.00020300 |
| H | -0.08766200 | -1.73817400 | 1.29469800  |
| H | -0.08764600 | -1.73804900 | -1.29483600 |
| C | -1.86811500 | -0.34384700 | 1.18318800  |
| H | -2.54401800 | -1.13402800 | 1.53913600  |
| H | -1.75154000 | 0.37084700  | 2.00217300  |
| C | -1.86810900 | -0.34372900 | -1.18321400 |

|   |             |             |             |
|---|-------------|-------------|-------------|
| H | -2.54401000 | -1.13387000 | -1.53925500 |
| H | -1.75151500 | 0.37104700  | -2.00212600 |
| N | -2.44677500 | 0.32145900  | 0.00001800  |
| H | -2.15304100 | 1.29007700  | 0.00007100  |

Name: 1-1 exo

Imaginary Frequency: 490.58 cm<sup>-1</sup>

Coordinates:

|   | X           | Y           | Z           |
|---|-------------|-------------|-------------|
| C | 1.25101700  | 0.22427000  | -1.15979400 |
| C | 1.25161300  | 0.22597600  | 1.15953500  |
| C | 0.99447200  | 1.17601500  | -0.00082500 |
| H | 1.88024000  | 1.83356600  | -0.00153500 |
| C | -0.54482400 | -1.07449500 | -0.69839900 |
| H | -0.12688600 | -1.87530800 | -1.28840200 |
| C | -0.54491600 | -1.07383800 | 0.69960400  |
| H | -0.12669200 | -1.87386100 | 1.29051700  |
| H | 1.11582700  | 0.51468100  | -2.19534200 |
| H | 1.11656200  | 0.51797400  | 2.19466400  |
| C | -1.80814700 | -0.39315800 | 1.18826000  |
| H | -2.54436900 | -1.16003500 | 1.48469400  |
| H | -1.66658600 | 0.27704300  | 2.04114700  |
| C | -1.80813000 | -0.39435900 | -1.18773900 |
| H | -1.66669600 | 0.27492300  | -2.04136400 |
| H | -2.54428700 | -1.16163700 | -1.48329000 |
| C | 2.22871700  | -0.66571900 | -0.70125700 |

|   |             |             |             |
|---|-------------|-------------|-------------|
| H | 2.81303100  | -1.33257500 | -1.32322600 |
| C | 2.22907600  | -0.66478700 | 0.70183700  |
| H | 2.81373900  | -1.33074800 | 1.32443600  |
| N | -2.23618300 | 0.37275600  | -0.00013500 |
| H | -3.22324300 | 0.59868800  | -0.00027500 |
| O | -0.09177900 | 2.04918300  | -0.00096600 |
| H | -0.94639100 | 1.55510900  | -0.00068300 |

Name: 1-2 endo

Imaginary Frequency: 478.64 cm<sup>-1</sup>

Coordinates:

|   | X           | Y           | Z           |
|---|-------------|-------------|-------------|
| C | 1.10353600  | 0.46198500  | 1.16088900  |
| C | 1.10355100  | 0.46206700  | -1.16085000 |
| C | 1.91088900  | -0.08967700 | 0.00000500  |
| H | 2.86023700  | 0.46553900  | 0.00003200  |
| C | -0.57417200 | -0.96096500 | 0.69629100  |
| C | -0.57416900 | -0.96091600 | -0.69636200 |
| H | 1.34864200  | 0.24824700  | 2.19445400  |
| H | 1.34866800  | 0.24840300  | -2.19442600 |
| C | 0.55068300  | 1.65754500  | 0.70318200  |
| H | 0.09445000  | 2.41897200  | 1.32192800  |
| C | 0.55069200  | 1.65759500  | -0.70306400 |
| H | 0.09446500  | 2.41906500  | -1.32176200 |
| O | 2.30828600  | -1.44333200 | -0.00004000 |
| H | 1.52698300  | -2.00294400 | -0.00011400 |

|   |             |             |             |
|---|-------------|-------------|-------------|
| H | -0.12094000 | -1.73538700 | 1.30349100  |
| H | -0.12094000 | -1.73529800 | -1.30361600 |
| C | -1.85895600 | -0.30759800 | 1.15994600  |
| H | -2.56760200 | -1.07138000 | 1.52096500  |
| H | -1.74147400 | 0.44485600  | 1.94369000  |
| C | -1.85894900 | -0.30751400 | -1.15997800 |
| H | -2.56759400 | -1.07126800 | -1.52105800 |
| H | -1.74146100 | 0.44499700  | -1.94366600 |
| O | -2.37479500 | 0.34971500  | 0.00000600  |

Name: 1-2 exo

Imaginary Frequency: 482.84 cm<sup>-1</sup>

Coordinates:

|   | X           | Y           | Z           |
|---|-------------|-------------|-------------|
| C | 1.24586000  | 0.22176300  | -1.16071200 |
| C | 1.24588500  | 0.22187500  | 1.16068800  |
| C | 0.98424500  | 1.16808000  | -0.00005400 |
| H | 1.86112100  | 1.83615500  | -0.00009600 |
| C | -0.55709700 | -1.07518700 | -0.69749900 |
| H | -0.15578000 | -1.88053000 | -1.29333300 |
| C | -0.55710000 | -1.07511700 | 0.69760900  |
| H | -0.15577700 | -1.88039300 | 1.29352900  |
| H | 1.11010400  | 0.51363900  | -2.19558400 |
| H | 1.11013600  | 0.51384500  | 2.19553400  |
| C | -1.81162800 | -0.36776100 | 1.16074200  |
| H | -2.57624300 | -1.09616000 | 1.47147300  |

|   |             |             |             |
|---|-------------|-------------|-------------|
| H | -1.68204900 | 0.35735800  | 1.96723500  |
| C | -1.81163400 | -0.36789200 | -1.16070400 |
| H | -1.68206700 | 0.35713500  | -1.96728200 |
| H | -2.57624600 | -1.09633200 | -1.47134600 |
| C | 2.22164700  | -0.66796000 | -0.70204100 |
| H | 2.80738100  | -1.33310900 | -1.32420800 |
| C | 2.22165900  | -0.66789400 | 0.70208400  |
| H | 2.80740600  | -1.33298300 | 1.32430300  |
| O | -0.10921100 | 2.03874500  | -0.00007900 |
| H | -0.95302600 | 1.55209300  | -0.00010500 |
| O | -2.26653500 | 0.35498600  | -0.00002100 |

Name: 1-3 endo

Imaginary Frequency: 491.29 cm<sup>-1</sup>

Coordinates:

|   | X           | Y           | Z           |
|---|-------------|-------------|-------------|
| C | 1.11446900  | 0.46111800  | 1.15996000  |
| C | 1.11444500  | 0.46116100  | -1.15995800 |
| C | 1.92348700  | -0.09163600 | -0.00001800 |
| H | 2.87337800  | 0.46338600  | -0.00001700 |
| C | -0.55351400 | -0.95696900 | 0.69897800  |
| C | -0.55352300 | -0.95694300 | -0.69900400 |
| H | 1.35911300  | 0.24686400  | 2.19360200  |
| H | 1.35907000  | 0.24694600  | -2.19361300 |
| C | 0.58637700  | 1.67076900  | 0.70287300  |
| H | 0.14967100  | 2.44056200  | 1.32621700  |



|   |             |             |             |
|---|-------------|-------------|-------------|
| C | 0.58636300  | 1.67079500  | -0.70281700 |
| H | 0.14964600  | 2.44061200  | -1.32612300 |
| O | 2.32009300  | -1.44520200 | -0.00004700 |
| H | 1.53785700  | -2.00375500 | -0.00004000 |
| H | -0.04977500 | -1.71820100 | 1.28534200  |
| H | -0.04979100 | -1.71815400 | -1.28540100 |
| C | -1.85070700 | -0.36609200 | 1.22856300  |
| H | -2.49908200 | -1.18213000 | 1.57420800  |
| H | -1.71520200 | 0.30875500  | 2.07838500  |
| C | -1.85072400 | -0.36604900 | -1.22854900 |
| H | -2.49910500 | -1.18207600 | -1.57421200 |
| H | -1.71523300 | 0.30882700  | -2.07835100 |
| C | -2.46917700 | 0.34259000  | 0.00002300  |
| H | -3.56066700 | 0.30126700  | 0.00003000  |
| H | -2.18559700 | 1.39623900  | 0.00004000  |

Name: 1-3 exo

Imaginary Frequency: 503.17  $\text{cm}^{-1}$

Coordinates:

|   | X           | Y           | Z           |
|---|-------------|-------------|-------------|
| C | -1.07879500 | -0.06416900 | 1.16100700  |
| C | -1.07878600 | -0.06420100 | -1.16100700 |
| C | -0.90667900 | 0.91103500  | -0.00001200 |
| C | 0.93727400  | -0.94482800 | 0.69979700  |
| H | 0.68141900  | -1.82309700 | 1.27417500  |
| C | 0.93727600  | -0.94485700 | -0.69975900 |

|   |             |             |             |
|---|-------------|-------------|-------------|
| H | 0.68141700  | -1.82314800 | -1.27410200 |
| H | -0.98616600 | 0.24751400  | 2.19406300  |
| H | -0.98615100 | 0.24745500  | -2.19407000 |
| C | 1.99993000  | 0.00319700  | -1.23486600 |
| H | 2.82205100  | -0.59168300 | -1.65233300 |
| H | 1.64826000  | 0.64875700  | -2.04573100 |
| C | 1.99992300  | 0.00325100  | 1.23486800  |
| H | 1.64824700  | 0.64884700  | 2.04570300  |
| H | 2.82204200  | -0.59160900 | 1.65236800  |
| C | -1.91607400 | -1.07864800 | 0.70713400  |
| H | -2.38754100 | -1.83090600 | 1.32720000  |
| C | -1.91606900 | -1.07866700 | -0.70711100 |
| H | -2.38753200 | -1.83094200 | -1.32716000 |
| C | 2.48035500  | 0.81119200  | -0.00001500 |
| H | 3.56358200  | 0.94861100  | -0.00001500 |
| H | 2.04514800  | 1.81264300  | -0.00003900 |
| O | -1.89726300 | 1.95357200  | -0.00003100 |
| H | -2.76670100 | 1.53540300  | -0.00002500 |
| H | 0.02989500  | 1.45375200  | -0.00001500 |

Name: 2-1 endo

Imaginary Frequency: 471.26 cm<sup>-1</sup>

Coordinates:

|   | X          | Y          | Z           |
|---|------------|------------|-------------|
| C | 1.10102300 | 0.50993900 | 1.15653500  |
| C | 1.09972300 | 0.51010300 | -1.15617900 |

|   |             |             |             |
|---|-------------|-------------|-------------|
| C | 1.91494900  | -0.02554800 | -0.00016700 |
| H | 2.81727700  | 0.61930400  | -0.00117700 |
| C | -0.50371700 | -0.99867200 | 0.69464300  |
| H | 0.02253900  | -1.74909400 | 1.26445300  |
| C | -0.50373500 | -0.99688900 | -0.69652500 |
| H | 0.02091400  | -1.74711200 | -1.26821400 |
| H | 1.35287500  | 0.31671900  | 2.19293700  |
| H | 1.35188100  | 0.31810200  | -2.19276000 |
| C | 0.50466100  | 1.69424000  | 0.70386800  |
| H | 0.08678500  | 2.46744300  | 1.33760100  |
| C | 0.50417000  | 1.69446700  | -0.70269300 |
| H | 0.08586600  | 2.46790000  | -1.33585600 |
| C | -1.80489200 | -0.44585400 | 1.22048600  |
| H | -2.52123500 | -1.23165200 | 1.47790800  |
| H | -1.73750100 | 0.25935700  | 2.04931900  |
| C | -1.80542400 | -0.44321700 | -1.22041200 |
| H | -1.73857500 | 0.26374200  | -2.04782700 |
| H | -2.52175300 | -1.22858000 | -1.47914600 |
| N | -2.34221900 | 0.29253800  | 0.00091300  |
| H | -3.35919600 | 0.38104400  | 0.00116700  |
| H | -1.93866500 | 1.23362300  | 0.00188900  |
| N | 2.25552700  | -1.43931900 | -0.00020500 |
| H | 2.82056200  | -1.66813500 | -0.81304700 |
| H | 2.82451900  | -1.66661200 | 0.81045400  |

Name: 2-1 exo

Imaginary Frequency: 484.00 cm<sup>-1</sup>

Coordinates:

|   | X           | Y           | Z           |
|---|-------------|-------------|-------------|
| C | -1.27138700 | 0.21126100  | 1.15905500  |
| C | -1.27145000 | 0.21094000  | -1.15903400 |
| C | -1.03972400 | 1.15560400  | -0.00011900 |
| H | -1.93358800 | 1.80124200  | -0.00018500 |
| C | 0.51838100  | -1.10644400 | 0.69985400  |
| H | 0.09859500  | -1.90610900 | 1.28885300  |
| C | 0.51834100  | -1.10656400 | -0.69967200 |
| H | 0.09858100  | -1.90636500 | -1.28850700 |
| H | -1.15817600 | 0.50366000  | 2.19715800  |
| H | -1.15832600 | 0.50307300  | -2.19722200 |
| C | 1.79108700  | -0.46552400 | -1.20550000 |
| H | 2.55129700  | -1.21486300 | -1.44812200 |
| H | 1.68930200  | 0.21348800  | -2.05361600 |
| C | 1.79117100  | -0.46537100 | 1.20550900  |
| H | 1.68946900  | 0.21372700  | 2.05356600  |
| H | 2.55139000  | -1.21469800 | 1.44814200  |
| C | -2.24073100 | -0.69137100 | 0.69962400  |
| H | -2.81898700 | -1.35657000 | 1.32683900  |
| C | -2.24077600 | -0.69156200 | -0.69929700 |
| H | -2.81907300 | -1.35693000 | -1.32629400 |
| N | 2.24113300  | 0.31976700  | -0.00006000 |
| H | 3.23357000  | 0.54915900  | -0.00010400 |
| H | 1.60996900  | 1.19073400  | -0.00013000 |

|   |            |            |             |
|---|------------|------------|-------------|
| N | 0.16032300 | 2.02181700 | -0.00025900 |
| H | 0.11314300 | 2.64167900 | -0.80774200 |
| H | 0.11317300 | 2.64187500 | 0.80707700  |

Name: 2-2 endo

Imaginary Frequency: 463.38 cm<sup>-1</sup>

Coordinates:

|   | X           | Y           | Z           |
|---|-------------|-------------|-------------|
| C | 1.14631000  | 0.49678300  | 1.15050300  |
| C | 1.09644400  | 0.44030300  | -1.17538300 |
| C | 1.92683400  | -0.07840500 | -0.01411300 |
| H | 2.85130400  | 0.51993400  | -0.05313500 |
| C | -0.53379000 | -0.98172400 | 0.72716500  |
| H | -0.06564400 | -1.72841800 | 1.35450200  |
| C | -0.52773200 | -1.01608100 | -0.66601300 |
| H | -0.04123700 | -1.78970400 | -1.24452600 |
| H | 1.41224900  | 0.31246000  | 2.18425600  |
| H | 1.33281800  | 0.21311100  | -2.20792100 |
| C | 0.57074400  | 1.67864300  | 0.67549500  |
| H | 0.18763600  | 2.48204500  | 1.29379300  |
| C | 0.54430500  | 1.64750400  | -0.73387700 |
| H | 0.14347100  | 2.42651000  | -1.37213900 |
| C | -1.81299400 | -0.35933500 | 1.23255200  |
| H | -2.55694100 | -1.10696300 | 1.52244600  |
| H | -1.71266100 | 0.37312500  | 2.03367700  |
| C | -1.81472000 | -0.44195600 | -1.20743100 |

|   |             |             |             |
|---|-------------|-------------|-------------|
| H | -1.72552300 | 0.23082400  | -2.06037300 |
| H | -2.55357400 | -1.21516200 | -1.43660400 |
| N | -2.32506300 | 0.35126500  | -0.01287300 |
| H | -3.33929800 | 0.46894200  | -0.01592500 |
| H | -1.89594100 | 1.28047400  | -0.04529300 |
| O | 2.37579100  | -1.40292200 | 0.00229200  |
| H | 1.66004700  | -2.01706300 | 0.18563400  |

Name: 2-2 exo

Imaginary Frequency: 481.45 cm<sup>-1</sup>

Coordinates:

|   | X           | Y           | Z           |
|---|-------------|-------------|-------------|
| C | -1.28193800 | 0.22286800  | 1.16355200  |
| C | -1.28166900 | 0.22172000  | -1.16380700 |
| C | -1.02449400 | 1.15278000  | -0.00056800 |
| H | -1.85800900 | 1.86853200  | -0.00100500 |
| C | 0.51233500  | -1.08659600 | 0.69944700  |
| H | 0.09321200  | -1.88711100 | 1.28795100  |
| C | 0.51221800  | -1.08726000 | -0.69827300 |
| H | 0.09315000  | -1.88848800 | -1.28586500 |
| H | -1.15449900 | 0.52105300  | 2.19730200  |
| H | -1.15399500 | 0.51884100  | -2.19783500 |
| C | 1.77793800  | -0.44411900 | -1.21547800 |
| H | 2.52536000  | -1.19296300 | -1.49417500 |
| H | 1.66317000  | 0.26263700  | -2.03780600 |
| C | 1.77796400  | -0.44264900 | 1.21594400  |

|   |             |             |             |
|---|-------------|-------------|-------------|
| H | 1.66307500  | 0.26515600  | 2.03735200  |
| H | 2.52547000  | -1.19103300 | 1.49564400  |
| C | -2.26801100 | -0.65446700 | 0.70200400  |
| H | -2.86875900 | -1.30306500 | 1.32568800  |
| C | -2.26791500 | -0.65518900 | -0.70154100 |
| H | -2.86856000 | -1.30438900 | -1.32469200 |
| N | 2.28302100  | 0.30818100  | -0.00024300 |
| H | 3.29249600  | 0.44785000  | -0.00035200 |
| O | 0.19437500  | 1.91194500  | -0.00081700 |
| H | 1.78323700  | 1.21580900  | -0.00071600 |
| H | -0.01006900 | 2.85181800  | -0.00093500 |

Name: 3 endo 1

Imaginary Frequency: 510.97 cm<sup>-1</sup>

Coordinates:

|   | X           | Y           | Z           |
|---|-------------|-------------|-------------|
| C | -1.63335600 | -0.29024100 | -1.08040800 |
| C | -1.63285100 | -0.29030700 | 1.08048500  |
| C | 0.42651700  | -0.84497400 | -0.70980400 |
| C | 0.42638200  | -0.84474700 | 0.70984200  |
| H | -1.87099800 | -0.71419100 | -2.04428600 |
| H | -1.87037300 | -0.71431100 | 2.04436500  |
| C | -1.70304000 | 1.07524200  | -0.68972100 |
| H | -1.70945300 | 1.91948500  | -1.36468500 |
| C | -1.70279000 | 1.07521200  | 0.68989800  |
| H | -1.70889200 | 1.91941500  | 1.36491200  |

|   |             |             |             |
|---|-------------|-------------|-------------|
| O | -1.97179000 | -1.05544500 | 0.00001400  |
| C | 1.60281500  | 0.08607900  | -1.01699700 |
| H | 1.82052700  | 0.40619800  | -2.03205400 |
| C | 1.60255300  | 0.08654100  | 1.01689200  |
| H | 1.82004100  | 0.40714300  | 2.03184600  |
| H | 0.31367100  | -1.73446600 | 1.31285000  |
| H | 0.31349300  | -1.73473600 | -1.31267700 |
| N | 1.32601300  | 1.21543000  | -0.00035100 |
| H | 2.04057600  | 1.94330500  | -0.00039800 |
| C | 2.68829700  | -0.40189300 | 0.00020400  |
| H | 3.60953900  | 0.19016400  | 0.00021200  |
| H | 2.90904100  | -1.46578500 | 0.00047000  |
| H | 0.37789100  | 1.60785800  | -0.00056500 |

Name: 3 endo 2

Imaginary Frequency: 465.97 cm<sup>-1</sup>

Coordinates:

|   | X           | Y           | Z           |
|---|-------------|-------------|-------------|
| C | 1.65483200  | -0.29031200 | 1.08028900  |
| C | 1.65657700  | -0.29246700 | -1.07926700 |
| C | -0.40216400 | -0.78580000 | 0.71446800  |
| C | -0.40260100 | -0.78700700 | -0.71402400 |
| H | 1.87703100  | -0.72161100 | 2.04465600  |
| H | 1.87892900  | -0.72545100 | -2.04283000 |
| C | 1.76047300  | 1.06963700  | 0.68667100  |
| H | 1.75720900  | 1.91719400  | 1.35586100  |



|   |             |             |             |
|---|-------------|-------------|-------------|
| C | 1.76123100  | 1.06827800  | -0.68818200 |
| H | 1.75886200  | 1.91452300  | -1.35903900 |
| O | 1.96730800  | -1.07171400 | 0.00119700  |
| C | -1.55920500 | 0.15582700  | 1.02159600  |
| H | -1.92199800 | 0.28806200  | 2.03684800  |
| C | -1.55961000 | 0.15399700  | -1.02223400 |
| H | -1.92313700 | 0.28434200  | -2.03746100 |
| H | -0.30532700 | -1.69367200 | -1.29702700 |
| H | -0.30554500 | -1.69178200 | 1.29869200  |
| C | -1.42087700 | 1.30402700  | -0.00137700 |
| H | -0.49284300 | 1.85927000  | -0.00209500 |
| H | -2.27550700 | 1.98256600  | -0.00180000 |
| N | -2.63157100 | -0.43136700 | 0.00067500  |
| H | -2.75904700 | -1.44573900 | 0.00165100  |
| H | -3.53802300 | 0.04850100  | 0.00060700  |

Name: 3 exo 1

Imaginary Frequency: 501.54 cm<sup>-1</sup>

Coordinates:

|   | X           | Y           | Z           |
|---|-------------|-------------|-------------|
| C | 1.45027900  | 1.08823900  | 0.41282200  |
| C | 1.45103100  | -1.08823700 | 0.41260100  |
| C | -0.36077500 | 0.70709400  | -0.80273000 |
| H | -0.09531700 | 1.33657600  | -1.63774100 |
| C | -0.36103100 | -0.70709200 | -0.80322800 |
| H | -0.09572500 | -1.33616400 | -1.63859800 |

|   |             |             |             |
|---|-------------|-------------|-------------|
| H | 1.33192300  | 2.05230200  | 0.88498900  |
| H | 1.33335400  | -2.05269500 | 0.88414000  |
| C | -1.64898000 | -1.01500700 | -0.03164400 |
| H | -1.90400800 | -2.03202000 | 0.25311300  |
| C | -1.64869100 | 1.01494800  | -0.03110900 |
| H | -1.90348100 | 2.03185300  | 0.25424700  |
| C | 2.39686400  | 0.68912300  | -0.55588600 |
| H | 2.92725400  | 1.35214300  | -1.22236600 |
| C | 2.39697800  | -0.68867100 | -0.55597300 |
| H | 2.92755500  | -1.35144600 | -1.22255500 |
| N | -1.52103300 | -0.00034800 | 1.12977700  |
| O | 1.17721600  | -0.00025000 | 1.21347400  |
| C | -2.66475300 | 0.00028400  | -0.65273100 |
| H | -3.65308400 | 0.00031300  | -0.18125300 |
| H | -2.74948700 | 0.00059000  | -1.73582400 |
| H | -0.62696700 | -0.00072600 | 1.63936200  |
| H | -2.32804300 | -0.00037200 | 1.75352900  |

Name: 3 exo 2

Imaginary Frequency: 458.64  $\text{cm}^{-1}$

Coordinates:

|   | X           | Y           | Z           |
|---|-------------|-------------|-------------|
| C | -1.49074400 | -1.08168200 | 0.42943300  |
| C | -1.49072700 | 1.08165000  | 0.42950800  |
| C | 0.33973400  | -0.71155700 | -0.73163500 |
| H | 0.08699600  | -1.32040000 | -1.58756200 |

|   |             |             |             |
|---|-------------|-------------|-------------|
| C | 0.33973400  | 0.71167800  | -0.73150700 |
| H | 0.08705400  | 1.32066800  | -1.58734800 |
| H | -1.39134000 | -2.04512200 | 0.90679100  |
| H | -1.39136000 | 2.04504900  | 0.90695700  |
| C | 1.61422900  | 1.02014500  | 0.04456700  |
| H | 1.98868700  | 2.03684700  | 0.12280100  |
| C | 1.61421800  | -1.02017200 | 0.04436700  |
| H | 1.98866700  | -2.03689400 | 0.12237300  |
| C | -2.38854200 | -0.68723400 | -0.59566800 |
| H | -2.88134100 | -1.35235500 | -1.28843900 |
| C | -2.38854200 | 0.68728200  | -0.59561500 |
| H | -2.88133500 | 1.35245500  | -1.28833900 |
| O | -1.25480400 | -0.00005500 | 1.22800700  |
| H | 3.56207600  | 0.00003000  | -0.32223400 |
| H | 2.59252000  | 0.00016400  | -1.70034500 |
| C | 1.63428600  | -0.00012500 | 1.20657200  |
| H | 2.58006900  | -0.00018300 | 1.75108200  |
| H | 0.79388700  | -0.00017400 | 1.88794900  |
| N | 2.60028100  | 0.00006300  | -0.67826700 |

Name: 3-1 endo

Imaginary Frequency: 463.42  $\text{cm}^{-1}$

Coordinates:

|   | X          | Y          | Z           |
|---|------------|------------|-------------|
| C | 0.93065400 | 1.89813900 | -0.01514100 |
| C | 1.62614700 | 0.88534300 | 0.66568000  |

|   |             |             |             |
|---|-------------|-------------|-------------|
| C | 0.63722100  | 0.00743200  | -1.26171400 |
| C | 0.31946700  | 1.36030600  | -1.15722800 |
| C | 1.87086100  | -0.14834500 | -0.41369400 |
| H | 2.74501200  | 0.16349700  | -0.99890400 |
| C | 0.01475400  | -0.19028800 | 1.59516400  |
| H | 0.63371600  | -0.76452900 | 2.28027900  |
| H | -0.44112800 | 0.66829700  | 2.06900500  |
| C | -0.64043200 | -0.83552700 | 0.54389600  |
| H | 2.33731700  | 1.08045100  | 1.46026400  |
| H | 0.37891700  | -0.63593900 | -2.09321700 |
| H | -0.36620900 | 1.88369100  | -1.80901400 |
| H | 0.79884900  | 2.90659200  | 0.35263600  |
| N | 2.19945300  | -1.55599700 | 0.04795300  |
| H | 2.36774200  | -2.17112400 | -0.75402200 |
| H | 3.04080200  | -1.56836200 | 0.63170700  |
| H | 1.42078000  | -1.94918100 | 0.58460500  |
| C | -1.98001500 | -0.47219400 | -0.02220700 |
| C | -2.67556800 | 0.77544900  | 0.47233100  |
| H | -2.01002000 | 1.64239200  | 0.49477200  |
| H | -3.53382700 | 0.98284500  | -0.16462700 |
| H | -3.02963800 | 0.61257600  | 1.49596300  |
| O | -2.49067200 | -1.21976600 | -0.83156300 |
| H | -0.43164400 | -1.88298800 | 0.32485900  |

Name: 3-1 exo

Imaginary Frequency: 304.67  $\text{cm}^{-1}$

Coordinates:

|   | X           | Y           | Z           |
|---|-------------|-------------|-------------|
| C | -2.18682000 | -1.18221900 | 0.21539500  |
| C | -1.81519700 | 0.01330700  | 0.83378800  |
| C | -1.16815400 | 0.01312400  | -1.42526000 |
| C | -1.72083800 | -1.20231600 | -1.12808200 |
| C | -1.46116900 | 0.96617500  | -0.30242400 |
| H | -2.43856400 | 1.40678100  | -0.57357500 |
| C | 0.03669700  | -0.47305100 | 1.61349500  |
| H | 0.19041000  | 0.50629900  | 2.05409500  |
| H | -0.35339600 | -1.20625200 | 2.30759400  |
| C | 0.94353700  | -0.93104800 | 0.64392200  |
| H | 0.97521500  | -1.99365900 | 0.43653000  |
| H | -2.28374200 | 0.36250800  | 1.74729600  |
| H | -0.71794200 | 0.30117000  | -2.36688600 |
| C | 1.95935500  | -0.16805700 | 0.04932900  |
| H | -1.78880500 | -2.04754100 | -1.79901200 |
| H | -2.70512100 | -1.99782600 | 0.70387100  |
| N | -0.48551500 | 2.03532400  | -0.03508600 |
| H | -0.41675400 | 2.64535200  | -0.84878300 |
| H | -0.82370900 | 2.62886900  | 0.72059900  |
| C | 3.14580400  | -0.80694200 | -0.58911000 |
| H | 3.06948400  | -1.89209600 | -0.61137500 |
| H | 3.27981700  | -0.41800500 | -1.60215900 |
| H | 4.04075500  | -0.52445800 | -0.02461600 |
| O | 1.98919300  | 1.13460800  | 0.05549200  |

H 1.05812500 1.53089500 0.19177700

Name: 3-2 endo

Imaginary Frequency: 452.06 cm<sup>-1</sup>

Coordinates:

|   | X           | Y           | Z           |
|---|-------------|-------------|-------------|
| C | 1.12324900  | 1.61945400  | 0.09673700  |
| C | 1.70926900  | 0.67236200  | 0.93868700  |
| C | 0.97728300  | -0.36904900 | -1.02560600 |
| C | 0.66617600  | 0.98096000  | -1.07924700 |
| C | 2.02154400  | -0.52657000 | 0.05656700  |
| C | 0.04026200  | -0.40044500 | 1.76926400  |
| H | -0.48685900 | 0.46379500  | 2.14775800  |
| C | -0.48953900 | -1.10024700 | 0.68807500  |
| H | 2.28681800  | 0.90811200  | 1.82431900  |
| H | 0.80218100  | -1.10123700 | -1.80256400 |
| H | 0.06276700  | 1.44954400  | -1.84411400 |
| H | 0.92297300  | 2.64781200  | 0.36377200  |
| H | 0.64597300  | -0.93406300 | 2.49343400  |
| C | -1.74090900 | -0.70870800 | -0.01052700 |
| O | -2.32126800 | -1.42759000 | -0.78820600 |
| H | -0.22672200 | -2.13791500 | 0.52007200  |
| N | 3.42312600  | -0.29528700 | -0.59057000 |
| H | 4.16914700  | -0.28849200 | 0.11028500  |
| H | 3.64085200  | -1.02183100 | -1.27769900 |
| H | 3.41904100  | 0.61134900  | -1.06980700 |

|   |             |             |             |
|---|-------------|-------------|-------------|
| H | 2.09941700  | -1.49537700 | 0.54078700  |
| C | -3.39059800 | 0.97554600  | -0.26475200 |
| H | -4.19860700 | 0.30258500  | 0.02087500  |
| H | -3.56002500 | 1.97248400  | 0.13368400  |
| H | -3.30716700 | 0.99854600  | -1.35151400 |
| O | -2.14524400 | 0.53157500  | 0.32689400  |

Name: 3-2 exo

Imaginary Frequency: 351.67 cm<sup>-1</sup>

Coordinates:

|   | X           | Y           | Z           |
|---|-------------|-------------|-------------|
| C | -2.22708400 | -1.48294700 | 0.31788100  |
| C | -2.09665400 | -0.17217800 | 0.80565900  |
| C | -1.30082200 | -0.31393100 | -1.39380500 |
| C | -1.67143400 | -1.57095300 | -0.97933100 |
| C | -0.26782700 | -0.18218600 | 1.63075800  |
| H | -0.49659700 | -0.92874200 | 2.38036700  |
| C | 0.73920900  | -0.50613500 | 0.70293900  |
| H | 0.98349500  | -1.54792500 | 0.55188400  |
| H | -2.68976900 | 0.18478100  | 1.64130200  |
| H | -0.83769100 | -0.05978500 | -2.33887700 |
| H | -1.54074900 | -2.48435200 | -1.54336800 |
| H | -2.62310200 | -2.31701600 | 0.88309600  |
| O | 1.36474800  | 1.70976400  | 0.03909900  |
| H | -0.30161000 | 0.83172000  | 2.01655600  |
| C | -1.88271500 | 0.68635400  | -0.43784500 |

|   |             |             |             |
|---|-------------|-------------|-------------|
| H | -2.90897100 | 0.85121700  | -0.81233800 |
| H | -1.24133700 | 2.49832800  | -1.15824800 |
| H | -1.69482200 | 2.55348300  | 0.39890800  |
| H | 0.34383100  | 1.87535100  | 0.03052400  |
| C | 1.61371000  | 0.44388900  | 0.12014300  |
| O | 2.78701400  | 0.14049900  | -0.37414600 |
| C | 3.36300700  | -1.17943900 | -0.22953000 |
| H | 3.38409300  | -1.47112600 | 0.82071400  |
| H | 2.80743700  | -1.90232400 | -0.82859200 |
| H | 4.37449400  | -1.08232200 | -0.61316600 |
| N | -1.19844900 | 1.98025300  | -0.28137200 |

Name: 3-3 endo

Imaginary Frequency: 464.60 cm<sup>-1</sup>

Coordinates:

|   | X           | Y           | Z           |
|---|-------------|-------------|-------------|
| C | -1.03964300 | 1.00009800  | 1.27497000  |
| C | -1.46859400 | 1.14647300  | -0.04574400 |
| C | -0.60534400 | -1.00460500 | 0.26100500  |
| C | -0.50170600 | -0.29505700 | 1.45058500  |
| C | -1.61373400 | -0.26514300 | -0.59044900 |
| C | 0.39819600  | 1.32342500  | -1.16101800 |
| H | 0.76865100  | 2.16130300  | -0.58561200 |
| C | 0.97074100  | 0.05759900  | -1.05319800 |
| H | -2.05234300 | 1.97878400  | -0.41969800 |
| H | -0.32637900 | -2.03825400 | 0.10673900  |



|   |             |             |             |
|---|-------------|-------------|-------------|
| H | 0.02644100  | -0.63545800 | 2.33022300  |
| H | -0.99576700 | 1.79620000  | 2.00566800  |
| H | -0.08791700 | 1.60423500  | -2.08861300 |
| C | 2.13114600  | -0.33417700 | -0.18429200 |
| O | 2.49615100  | -1.49528200 | -0.13468600 |
| H | 0.82504100  | -0.65700400 | -1.85567200 |
| N | -3.03388600 | -0.78608400 | -0.21291700 |
| H | -3.77227400 | -0.25522100 | -0.68257900 |
| H | -3.14613600 | -1.77282700 | -0.46074100 |
| H | -3.15931100 | -0.69197500 | 0.80060900  |
| H | -1.54962500 | -0.39437900 | -1.66673800 |
| N | 2.70415300  | 0.65481200  | 0.57209000  |
| H | 3.54413800  | 0.39166100  | 1.06984900  |
| H | 2.63803100  | 1.62241400  | 0.29869500  |

Name: 3-3 exo

Imaginary Frequency: 373.84  $\text{cm}^{-1}$

Coordinates:

|   | X           | Y           | Z           |
|---|-------------|-------------|-------------|
| C | -2.30789600 | -1.02019900 | 0.24631800  |
| C | -1.79208800 | 0.15357700  | 0.82437700  |
| C | -1.02938600 | -0.07110100 | -1.37370800 |
| C | -1.78354100 | -1.17948900 | -1.05331100 |
| C | -1.32742500 | 0.99505200  | -0.35853800 |
| H | -2.25769200 | 1.46553100  | -0.72192800 |
| C | -0.02375100 | -0.44939100 | 1.56728200  |

|   |             |             |             |
|---|-------------|-------------|-------------|
| H | -0.43939800 | -1.17288300 | 2.25624200  |
| C | 0.81217900  | -0.94234300 | 0.55277300  |
| H | 0.75595100  | -1.99243800 | 0.29267600  |
| H | -2.24903600 | 0.60957000  | 1.69657900  |
| H | -0.50423900 | 0.09857700  | -2.30502900 |
| H | -1.92274100 | -2.04793200 | -1.68268200 |
| H | -2.93879500 | -1.73628900 | 0.75664200  |
| C | 1.94654400  | -0.24315300 | 0.04413100  |
| O | 2.07617100  | 1.05170800  | 0.08020200  |
| N | -0.31369100 | 2.03723200  | -0.11620000 |
| H | 1.13973300  | 1.49953600  | 0.11391900  |
| H | -0.23571000 | 2.63224400  | -0.94009700 |
| H | -0.62614000 | 2.65190500  | 0.63377300  |
| H | 0.24855900  | 0.48624200  | 2.04507500  |
| N | 2.97675000  | -0.90459400 | -0.48563600 |
| H | 3.04224500  | -1.90880600 | -0.43261500 |
| H | 3.76867600  | -0.38511100 | -0.83727600 |

Name: 3-4 endo

Imaginary Frequency: 480.05  $\text{cm}^{-1}$

Coordinates:

|   | X          | Y           | Z           |
|---|------------|-------------|-------------|
| C | 1.60804500 | 1.26780500  | 0.24103200  |
| C | 1.97626500 | -0.01637800 | 0.68511200  |
| C | 0.84529000 | -0.19819100 | -1.32484000 |
| C | 0.89928700 | 1.14726900  | -0.96271200 |

|   |             |             |             |
|---|-------------|-------------|-------------|
| C | 0.17053800  | -0.76661500 | 1.45153800  |
| H | -0.06874600 | 0.00281400  | 2.17526100  |
| C | -0.64958800 | -0.95675700 | 0.33412200  |
| H | 2.68168000  | -0.18314400 | 1.49076000  |
| H | 0.40770700  | -0.57931200 | -2.23765700 |
| H | 0.38185900  | 1.95078900  | -1.46993100 |
| H | 1.73955000  | 2.18337600  | 0.80460300  |
| H | 0.64533700  | -1.63590400 | 1.89217800  |
| C | -1.83828400 | -0.13929700 | -0.00093000 |
| O | -2.69285600 | -0.53595800 | -0.78400900 |
| H | -0.68493700 | -1.92769400 | -0.14284800 |
| N | -1.97203900 | 1.07333700  | 0.64276300  |
| H | -1.17293300 | 1.52136400  | 1.06125600  |
| H | -2.70086700 | 1.67563300  | 0.29110200  |
| C | 1.90853400  | -0.91241900 | -0.53484300 |
| H | 1.73603900  | -1.97039300 | -0.34535800 |
| H | 2.86190600  | -0.81573000 | -1.07750400 |

Name: 3-4 exo

Imaginary Frequency: 465.75  $\text{cm}^{-1}$

Coordinates:

|   | X           | Y           | Z           |
|---|-------------|-------------|-------------|
| C | -2.45183900 | 0.14336500  | -0.47673600 |
| C | -1.77892000 | -0.92129600 | 0.16054200  |
| C | -0.77508100 | 1.07780900  | 0.74086300  |
| C | -1.80961100 | 1.34468800  | -0.15317500 |

|   |             |             |             |
|---|-------------|-------------|-------------|
| C | -0.16153000 | -1.18603700 | -1.05652200 |
| H | -0.68884600 | -1.33284900 | -1.98985400 |
| C | 0.64618300  | -0.05108800 | -0.91182900 |
| H | 0.57017100  | 0.75806800  | -1.62801800 |
| H | -2.19630400 | -1.91938900 | 0.22978200  |
| H | -0.12981300 | 1.81818200  | 1.19476500  |
| H | -2.01806500 | 2.30735500  | -0.60262900 |
| H | -3.23720300 | 0.03254900  | -1.21393300 |
| C | 1.85199600  | -0.09097700 | -0.06540500 |
| O | 2.07743900  | -0.97072900 | 0.76204500  |
| H | 0.19143800  | -2.09658700 | -0.58419200 |
| N | 2.72901600  | 0.96392800  | -0.22865500 |
| H | 2.67910800  | 1.54433400  | -1.05028400 |
| H | 3.63051000  | 0.86622900  | 0.21278800  |
| C | -0.98605300 | -0.30089900 | 1.29163700  |
| H | -1.65073400 | -0.22282100 | 2.16662100  |
| H | -0.08375600 | -0.83013500 | 1.59291800  |

Name: 3-1 endo (DCM)

Imaginary Frequency: 447.14  $\text{cm}^{-1}$

Coordinates:

|   | X          | Y           | Z           |
|---|------------|-------------|-------------|
| C | 1.04849200 | 1.48829200  | -0.61495800 |
| C | 1.41767800 | 0.93435900  | 0.61544000  |
| C | 0.70040500 | -0.75802900 | -0.83015900 |
| C | 0.58588200 | 0.46172700  | -1.47011600 |

|   |             |             |             |
|---|-------------|-------------|-------------|
| C | 1.62093700  | -0.55378900 | 0.35509000  |
| C | -0.38909000 | 0.58776200  | 1.59168500  |
| H | -0.81191200 | 1.57891100  | 1.49662100  |
| C | -0.98507300 | -0.49391900 | 0.93511200  |
| H | 1.98596800  | 1.46390600  | 1.36948300  |
| H | 0.47224100  | -1.72954200 | -1.24516100 |
| H | 0.12061400  | 0.61800100  | -2.43361600 |
| H | 1.00095500  | 2.54717300  | -0.82903000 |
| H | 0.09714300  | 0.40312300  | 2.54296000  |
| C | -2.16115800 | -0.39954600 | 0.05143400  |
| O | -2.76452600 | -1.41764300 | -0.27807400 |
| H | -0.79180300 | -1.50240700 | 1.28413400  |
| C | -2.64582300 | 0.96327100  | -0.39157800 |
| H | -3.16514600 | 1.44967300  | 0.44094100  |
| H | -1.82496700 | 1.62070700  | -0.68670100 |
| H | -3.34414400 | 0.84927500  | -1.21969000 |
| N | 3.07026100  | -0.79439900 | -0.08368000 |
| H | 3.72637300  | -0.57096400 | 0.66917000  |
| H | 3.21943300  | -1.77420000 | -0.33795800 |
| H | 3.30986000  | -0.21759800 | -0.89477700 |
| H | 1.47626200  | -1.21489300 | 1.20228000  |

Name: 3-1 exo (DCM)

Imaginary Frequency: 322.03  $\text{cm}^{-1}$

Coordinates:

|   | X           | Y           | Z          |
|---|-------------|-------------|------------|
| C | -2.17620500 | -1.17274400 | 0.20440100 |

|   |             |             |             |
|---|-------------|-------------|-------------|
| C | -1.83109500 | 0.03146800  | 0.81138800  |
| C | -1.13499800 | 0.00872000  | -1.43378700 |
| C | -1.68622000 | -1.20439600 | -1.13320200 |
| C | -1.44037400 | 0.96848600  | -0.32039200 |
| H | -2.40060700 | 1.43044300  | -0.61109300 |
| C | 0.03005500  | -0.47967000 | 1.63832200  |
| H | -0.39051200 | -1.20919400 | 2.31701600  |
| C | 0.94192900  | -0.93940000 | 0.67900000  |
| H | 0.97383000  | -2.00136600 | 0.46996500  |
| H | -2.29517700 | 0.39044500  | 1.72182600  |
| H | -0.66289400 | 0.29258500  | -2.36498800 |
| H | -1.73311100 | -2.05986000 | -1.79218900 |
| H | -2.68973100 | -1.98887500 | 0.69555000  |
| C | 1.93681800  | -0.16709700 | 0.06507600  |
| O | 1.95650000  | 1.13516200  | 0.07371100  |
| N | -0.45271700 | 2.02325100  | -0.03853100 |
| H | 0.98579300  | 1.53591500  | 0.16534000  |
| H | -0.40308900 | 2.65783600  | -0.83423700 |
| H | -0.77409100 | 2.59096500  | 0.74363400  |
| H | 0.16399200  | 0.50565000  | 2.07004200  |
| C | 3.10843600  | -0.80494800 | -0.60674100 |
| H | 3.18655000  | -0.44186000 | -1.63515100 |
| H | 4.02250200  | -0.49820500 | -0.08864500 |
| H | 3.04347700  | -1.89105000 | -0.60142900 |

Name: 3-2 endo (DCM)

Imaginary Frequency: 450.83 cm<sup>-1</sup>

Coordinates:

|   | X           | Y           | Z           |
|---|-------------|-------------|-------------|
| C | 1.08608200  | 1.59268100  | 0.25982900  |
| C | 1.67993400  | 0.55933400  | 0.98951000  |
| C | 1.00033600  | -0.23828800 | -1.10135400 |
| C | 0.65222600  | 1.09428000  | -0.99002100 |
| C | 2.02875100  | -0.52106200 | -0.02742600 |
| C | 0.06265300  | -0.54677400 | 1.71170100  |
| H | -0.46902300 | 0.26710700  | 2.18335600  |
| C | -0.49879200 | -1.17199600 | 0.59807900  |
| H | 2.26838700  | 0.71013500  | 1.88566100  |
| H | 0.84637400  | -0.87712500 | -1.95956100 |
| H | 0.04963900  | 1.64269600  | -1.70050300 |
| H | 0.87225400  | 2.58017900  | 0.64438200  |
| H | 0.68033600  | -1.13939100 | 2.37643900  |
| O | -2.37542900 | -1.38555100 | -0.84974000 |
| H | -0.21331400 | -2.18090500 | 0.32914000  |
| N | 3.42864200  | -0.24576300 | -0.59079300 |
| H | 4.14695000  | -0.33188700 | 0.13277000  |
| H | 3.66365200  | -0.90712900 | -1.33519800 |
| H | 3.48193600  | 0.69969900  | -0.97986300 |
| H | 2.07391400  | -1.53801600 | 0.34673800  |
| C | -1.74445900 | -0.72643300 | -0.04220300 |
| O | -2.12975300 | 0.50047300  | 0.36727400  |
| C | -3.34245200 | 1.02304600  | -0.21335300 |

|   |             |            |             |
|---|-------------|------------|-------------|
| H | -4.18651700 | 0.37615200 | 0.02664800  |
| H | -3.47712800 | 2.00538900 | 0.23271000  |
| H | -3.24217900 | 1.10532300 | -1.29601200 |

Name: 3-2 exo (DCM)

Imaginary Frequency: 426.76 cm<sup>-1</sup>

Coordinates:

|   | X           | Y           | Z           |
|---|-------------|-------------|-------------|
| C | -2.69068600 | -1.02458900 | 0.12362900  |
| C | -2.27600100 | 0.22738400  | 0.61271000  |
| C | -1.08001300 | -0.31526800 | -1.32258600 |
| C | -1.92932800 | -1.36323600 | -1.00840100 |
| C | -1.62088100 | 0.88135600  | -0.58910200 |
| H | -2.44364700 | 1.27903700  | -1.19627100 |
| C | -0.58184500 | -0.26245000 | 1.66136200  |
| H | -1.09258000 | -0.93279500 | 2.33811500  |
| C | 0.34361400  | -0.80773900 | 0.76473300  |
| H | 0.35445600  | -1.87238400 | 0.57930100  |
| H | -2.85105300 | 0.80016800  | 1.33056200  |
| H | -0.40665300 | -0.26180600 | -2.16697900 |
| H | -1.94558100 | -2.32098300 | -1.50969900 |
| H | -3.39655400 | -1.67573400 | 0.62054700  |
| C | 1.54120700  | -0.09445500 | 0.35440200  |
| O | 1.68656800  | 1.13594000  | 0.38012800  |
| N | -0.70147800 | 2.03848100  | -0.34985100 |
| H | 0.24030500  | 1.75716300  | 0.05785700  |



|   |             |             |             |
|---|-------------|-------------|-------------|
| H | -0.50746700 | 2.51879300  | -1.23129900 |
| H | -1.13709100 | 2.72747000  | 0.26710000  |
| H | -0.37015200 | 0.71166000  | 2.09152400  |
| O | 2.51339600  | -0.90826700 | -0.06198800 |
| C | 3.74747300  | -0.29574000 | -0.50341300 |
| H | 4.19734500  | 0.27392300  | 0.30901000  |
| H | 4.38854200  | -1.12465300 | -0.79073500 |
| H | 3.55953200  | 0.35780900  | -1.35520700 |

Name: 3-3 endo (DCM)

Imaginary Frequency: 461.24 cm<sup>-1</sup>

Coordinates:

|   | X           | Y           | Z           |
|---|-------------|-------------|-------------|
| C | 1.02808800  | 1.37944100  | -0.81784900 |
| C | 1.44364700  | 1.01354500  | 0.46453700  |
| C | 0.65069400  | -0.86852400 | -0.67090300 |
| C | 0.52860500  | 0.24075900  | -1.49003400 |
| C | 1.62255700  | -0.49870300 | 0.42954200  |
| C | -0.37590100 | 0.78948300  | 1.54113600  |
| H | -0.76275200 | 1.78398500  | 1.36161900  |
| C | -0.98823700 | -0.33598900 | 0.99079700  |
| H | 2.02458300  | 1.64556900  | 1.12392200  |
| H | 0.41495200  | -1.88998900 | -0.93422400 |
| H | 0.02871800  | 0.25538000  | -2.44820600 |
| H | 0.97549200  | 2.39441800  | -1.18728200 |
| H | 0.12883500  | 0.68634400  | 2.49454200  |

|   |             |             |             |
|---|-------------|-------------|-------------|
| C | -2.16674100 | -0.33043600 | 0.08742400  |
| O | -2.79075800 | -1.37090500 | -0.13781000 |
| H | -0.84475100 | -1.30122700 | 1.45995900  |
| N | 3.04908900  | -0.82415500 | -0.03314400 |
| H | 3.74375000  | -0.50117800 | 0.64488000  |
| H | 3.17892100  | -1.83281200 | -0.14716100 |
| H | 3.24941800  | -0.37628700 | -0.93189800 |
| H | 1.51223500  | -1.02166100 | 1.37351200  |
| N | -2.52710800 | 0.85116600  | -0.47959400 |
| H | -2.08987400 | 1.72867200  | -0.25441200 |
| H | -3.34360400 | 0.86949600  | -1.07151000 |

Name: 3-3 exo (DCM)

Imaginary Frequency: 442.01  $\text{cm}^{-1}$

Coordinates:

|   | X           | Y           | Z           |
|---|-------------|-------------|-------------|
| C | -2.36514200 | -0.93118000 | 0.26304200  |
| C | -1.83540200 | 0.27614600  | 0.75265900  |
| C | -0.84926400 | -0.25201700 | -1.29702900 |
| C | -1.73264200 | -1.26263000 | -0.94666400 |
| C | -1.25781600 | 0.94339200  | -0.47960300 |
| H | -2.11089100 | 1.40010800  | -0.99733900 |
| C | -0.05824300 | -0.35554600 | 1.59830300  |
| H | -0.53721900 | -1.03737700 | 2.28644500  |
| C | 0.73207800  | -0.88776500 | 0.57485400  |
| H | 0.65598300  | -1.94315100 | 0.34780500  |

|   |             |             |             |
|---|-------------|-------------|-------------|
| H | -2.29893200 | 0.84728200  | 1.54824900  |
| H | -0.26045600 | -0.19951800 | -2.20278800 |
| H | -1.85080700 | -2.19615100 | -1.47942500 |
| H | -3.05620800 | -1.56448100 | 0.80213600  |
| C | 1.93662100  | -0.20844200 | 0.09155600  |
| O | 2.09074600  | 1.03726700  | 0.16562200  |
| N | -0.26327500 | 2.04033300  | -0.28070400 |
| H | 0.71863700  | 1.68208600  | 0.01002700  |
| H | -0.13909300 | 2.56054700  | -1.15143900 |
| H | -0.60108300 | 2.70997900  | 0.41277900  |
| H | 0.24996000  | 0.58051200  | 2.05332900  |
| N | 2.90316100  | -0.97581600 | -0.44571900 |
| H | 2.84841900  | -1.98186600 | -0.44793100 |
| H | 3.75538100  | -0.53947800 | -0.76457700 |

Name: 3-4 endo (DCM)

Imaginary Frequency: 467.12  $\text{cm}^{-1}$

Coordinates:

|   | X           | Y           | Z           |
|---|-------------|-------------|-------------|
| C | 1.57416000  | 1.23875000  | 0.36613800  |
| C | 1.93308300  | -0.08341000 | 0.70395900  |
| C | 0.89782000  | -0.07011900 | -1.36701400 |
| C | 0.91346800  | 1.23022700  | -0.87111200 |
| C | 0.17645900  | -0.87786500 | 1.37757600  |
| H | -0.06849100 | -0.17925300 | 2.16849700  |
| C | -0.66601000 | -0.99424600 | 0.26214300  |

|   |             |             |             |
|---|-------------|-------------|-------------|
| H | 2.62529200  | -0.31396000 | 1.50523500  |
| H | 0.48804100  | -0.37227600 | -2.32135600 |
| H | 0.40800900  | 2.07682000  | -1.31674000 |
| H | 1.67227300  | 2.09671900  | 1.01955500  |
| H | 0.64694800  | -1.78283700 | 1.74528000  |
| C | -1.83291100 | -0.14308900 | -0.01123500 |
| O | -2.70080000 | -0.47054600 | -0.83269700 |
| H | -0.68522800 | -1.91971900 | -0.29830100 |
| N | -1.96314800 | 1.01507700  | 0.71126500  |
| H | -1.17681700 | 1.40856700  | 1.20400700  |
| H | -2.67130900 | 1.66462000  | 0.40298500  |
| C | 1.91724800  | -0.86111300 | -0.59790100 |
| H | 1.73407300  | -1.93089100 | -0.51790700 |
| H | 2.89573800  | -0.72376800 | -1.08386800 |

Name: 3-4 exo (DCM)

Imaginary Frequency: 456.17  $\text{cm}^{-1}$

Coordinates:

|   | X           | Y           | Z           |
|---|-------------|-------------|-------------|
| C | -2.44357800 | 0.11993700  | -0.48645400 |
| C | -1.76813400 | -0.92063600 | 0.18921200  |
| C | -0.79109400 | 1.10768300  | 0.72222000  |
| C | -1.81409200 | 1.33666900  | -0.19392100 |
| C | -0.16740400 | -1.22992000 | -1.00528200 |
| H | -0.69453500 | -1.40957000 | -1.93300800 |
| C | 0.65202100  | -0.09609200 | -0.91214800 |

|   |             |             |             |
|---|-------------|-------------|-------------|
| H | 0.56844600  | 0.68800500  | -1.65414900 |
| H | -2.18448900 | -1.91624100 | 0.29068800  |
| H | -0.15642000 | 1.86820600  | 1.15757200  |
| H | -2.02407400 | 2.28251900  | -0.67689000 |
| H | -3.21888500 | -0.02069400 | -1.22902600 |
| C | 1.86028500  | -0.08913900 | -0.07742700 |
| O | 2.12793800  | -0.96627100 | 0.75657800  |
| H | 0.17838500  | -2.12809000 | -0.50496200 |
| N | 2.72437000  | 0.95273700  | -0.29318300 |
| H | 2.46014200  | 1.74489600  | -0.85655200 |
| H | 3.50947800  | 1.05916000  | 0.33042500  |
| C | -0.99179800 | -0.25723600 | 1.30845200  |
| H | -1.66223100 | -0.16571700 | 2.17734800  |
| H | -0.08714800 | -0.76906600 | 1.63030400  |
